# Supplementary material for: Galectin-1 activates carbonic anhydrase IX and modulates glioma metabolism
Source: PubMed Central journal article supplement (PMC9247167; doi:10.1038/s41419-022-05024-z), 2022-06-30

Supplementary Figure-2

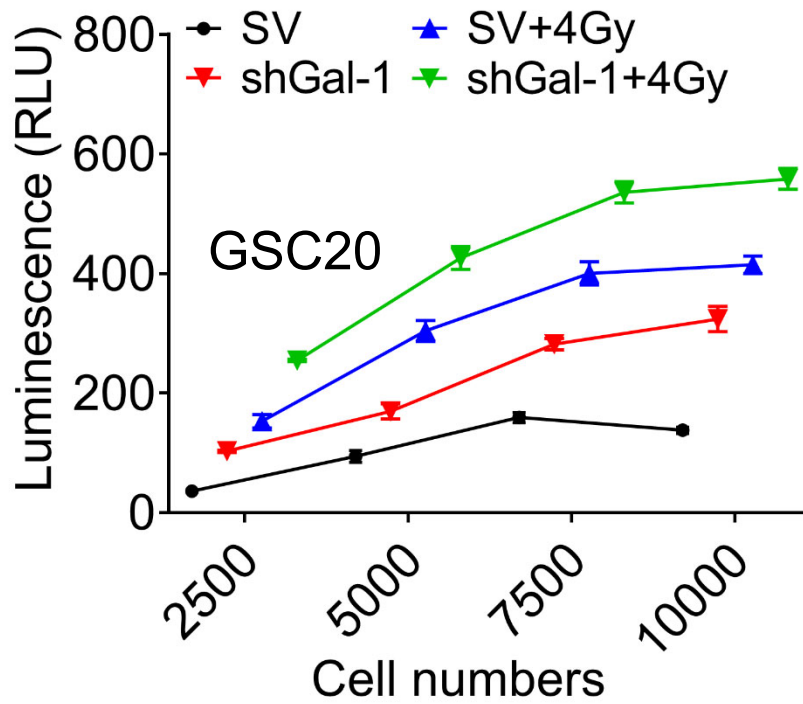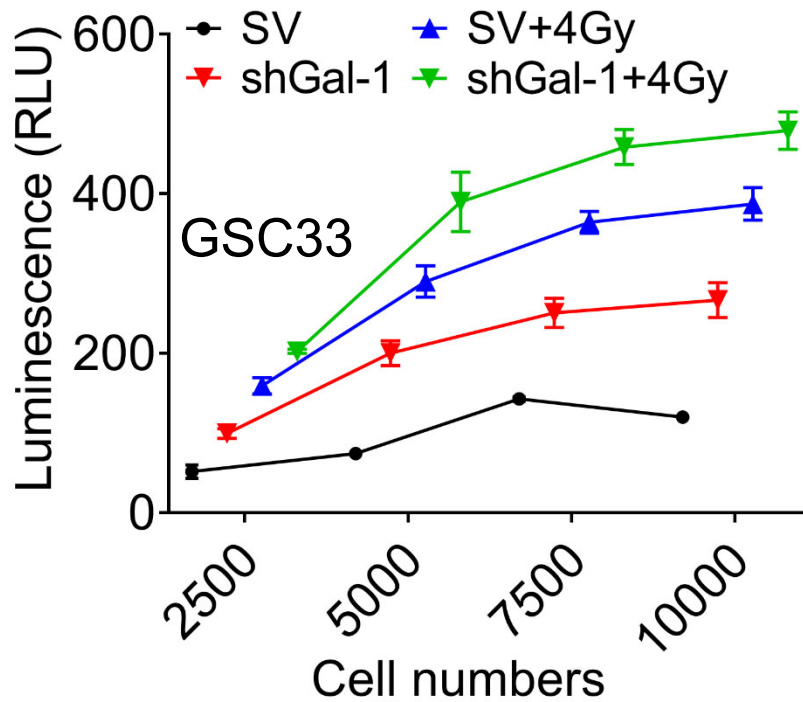

Supplement: 41419_2022_5024_MOESM3_ESM.pdf [file 41419_2022_5024_MOESM3_ESM.pdf]
